# Supplementary material for: Pharmacogenetics of novel glucose-lowering drugs
Source: Springer Nature journal article supplement (doi:10.1007/s00125-021-05402-w), 2021-02-16
Supplement: MOESM1 [file 18864902]

## MEDLINE Search strategy

---

- 1 exp Diabetes Mellitus, Type 2/ (133306)
- 2 exp Diabetes Complications/ (131813)
- 3 (obes\* adj3 diabet\*).tw. (31978)
- 4 (MODY or NIDDM or T2DM or T2D).tw. (38785)
- 5 (non insulin\* depend\* or noninsulin\* depend\* or noninsulin?depend\* or non insulin?depend\*).tw. (12291)
- 6 ((typ? 2 or typ? II or typ?2 or typ?II) adj3 diabet\*).tw. (146295)
- 7 ((adult\* or matur\* or late or slow or stabl\*) adj3 diabet\*).tw. (14405)
- 8 or/1-7 (325932)
- 9 exp Diabetes Insipidus/ (7868)
- 10 diabet\* insipidus.tw. (8540)
- 11 or/9-10 (10824)
- 12 8 not 11 (325612)
- 13 allele\*.tw. or alleles/ (262329)
- 14 (gene\* or genotyp\*).tw. or genotype/ (5175867)
- 15 polymorphi\*.tw. or polymorphism, genetic/ (330354)
- 16 (variant\* or variation\*).tw. or genetic variation/ (1064491)
- 17 genetic predisposition to disease/ (137803)
- 18 pharmacogenet\*.tw. or pharmacogenetics/ (17560)
- 19 polymorphism, single nucleotide/ (116416)
- 20 SNP.tw. (56490)
- 21 (single adj3 polymorphism\*).tw. (85690)
- 22 or/13-21 (5870866)
- 23 Dipeptidyl-Peptidase IV Inhibitors/ (3921)
- 24 (Dipeptidyl peptidase IV Inhibitor\* or dipeptidyl peptidase 4 inhibitor\* or dipeptidylpeptidase 4 inhibitor\* or dipeptidylpeptidase IV inhibitor\*).tw. (2686)
- 25 ((dpp adj IV adj inhibitor\*) or (dpp adj "4" adj inhibitor\*) or (Dipeptidyl Peptidase adj IV adj inhibitor\*) or (Dipeptidyl Peptidase adj "4" adj inhibitor\*) or (DipeptidylPeptidase adj IV adj inhibitor\*) or (DipeptidylPeptidase adj "4" adj inhibitor\*).tw. (4927)
- 26 ((dpp adj IV) or (dpp adj "4") or (Dipeptidyl Peptidase adj IV) or (Dipeptidyl Peptidase adj "4") or (DipeptidylPeptidase adj IV) or (DipeptidylPeptidase

- adj "4").tw. (8576)
- 27 incretins/ (1914)
- 28 incretin\*.tw. (4743)
- 29 (Linagliptin\* or Saxagliptin\* or Sitagliptin\* or Vildagliptin\* or Alogliptin\* or Gliptin\* or Gemigliptin\* or Gosogliptin\* or dutogliptin\*).tw. (4322)
- 30 or/23-29 (14401)
- 31 Sodium-Glucose Transporter 2 Inhibitors/ (2215)
- 32 (Sodium glucose cotransporter 2 inhibitor\* or sodium glucose co transporter 2 inhibitor\* or sodium glucose transporter 2 inhibitor\* or sodium dependent glucose transporter 2 inhibitor\*).tw. (1732)
- 33 (SGLT2 inhibitor\* or SGLT 2 inhibitor\*).tw. (2558)
- 34 (Dapagliflozin\* or Canagliflozin\* or Ipragliflozin\* or Empagliflozin\* or Remogliflozin\* or Tofogliflozin\* or atigliflozin or bexagliflozin or ertugliflozin or luseogliflozin or sergliflozin or sotagliflozin or licogliflozin).tw. (3093)
- 35 (Sodium glucose cotransporter 2 or sodium glucose co transporter 2 or sodium glucose transporter 2 or sodium dependent glucose transporter 2).tw. (2989)
- 36 or/31-35 (5312)
- 37 (glucagon like peptide 1 Receptor agonist\* or (GLP 1 adj receptor adj agonist\*).tw. (3165)
- 38 (Exenatide\* or Liraglutide\* or Albiglutide\* or Semaglutide or Taspoglutide or dulaglutide or lixisenatide or albiglutide or exendin-4 or tirzepatide\*).tw. (6015)
- 39 Glucagon-Like Peptide 1/ag, aa, de, ge, me, pd, tu [Agonists, Analogs & Derivatives, Drug Effects, Genetics, Metabolism, Pharmacology, Therapeutic Use] (4550)
- 40 glucagon-like peptide 1 receptor/ (2943)
- 41 (glucagon like peptide 1 or GLP 1).tw. (14299)
- 42 or/37-41 (17159)
- 43 or/30,36,42 (29883)
- 44 12 and 22 and 43 (2626)
- 45 exp animals/ not humans/ (4724721)
- 46 44 not 45 (2260)
- 47 non\$diabet\*.tw. (18476)
- 48 12 or 47 (335217)
- 49 and/22,43,48 (2663)
-

The numbers in brackets refer to the number of identified references for each search term.
